# Supplementary material for: Integrating Medical History into Organ-System Based Curriculum : A Retrospective Study
Source: Research Square preprint supplement (doi:10.21203/rs.3.rs-6994936/v1), 2025-10-08
Supplement: Supplementary file 1 [file 532d4bb4b6058218835216a5.pdf]

## Course Satisfaction Survey

This anonymous survey is designed to evaluate your satisfaction with the integration of medical history into lecture-based learning within Organ-System Based Curriculum. Your feedback is essential for improving future course design.

### Part 1: Demographic Information

1. Your academic role:

- ☐ Student
- ☐ Faculty
- ☐ Other (please specify): \_\_\_\_\_

### Part 2: Satisfaction Rating

Please indicate your level of satisfaction with the following statement. Use the scale below:

1 = Neutral      2 = Satisfied      3 = Very Satisfied

| Statement                                                                               | 1                     | 2                     | 3                     |
|-----------------------------------------------------------------------------------------|-----------------------|-----------------------|-----------------------|
| I am satisfied with the integration of medical history into the lecture-based teaching. | <input type="radio"/> | <input type="radio"/> | <input type="radio"/> |

This is an anonymous survey. No personal identifiers will be collected, and responses will be used for research purposes only.
